# Supplementary material for: PEG-b-AGE polymer coated magnetic nanoparticle probes with facile functionalization and anti-fouling properties for reducing non-specific uptake and improving biomarker targeting
Source: Royal Society of Chemistry journal article supplement (doi:10.1039/c4tb01828a), 2015-01-01
Supplement: c4tb01828a1.pdf [file c4tb01828a1.pdf]

## PEG-*b*-AGE Polymer Coated Magnetic Nanoparticle Probes with Facile Functionalization and Anti-fouling Properties for Reducing Non-specific Uptake and Improving Biomarker Targeting

Yuan Cheng Li,<sup>a†</sup> Run Lin,<sup>a,b†</sup> Liya Wang,<sup>a</sup> Jing Huang,<sup>a</sup> Hui Wu,<sup>a</sup> Guojun Cheng,<sup>a</sup> Zhengyang Zhou,<sup>a,c</sup> Tobey MacDonald,<sup>d</sup> Lily Yang<sup>e</sup> and Hui Mao<sup>a</sup>

<sup>a</sup> Department of Radiology and Imaging Sciences, Emory University School of Medicine, Atlanta, GA 30322, USA

<sup>b</sup> Department of Radiology, the First Affiliated Hospital of Sun Yat-Sen University, Guangzhou, Guangdong, China

<sup>c</sup> Department of Radiology, Nanjing University College of Medicine and Affiliated Drum Tower Hospital, Nanjing, Jiangsu, China

<sup>d</sup> Department of Pediatrics, Emory University School of Medicine, Atlanta, GA 30322, USA

<sup>e</sup> Department of Surgery, Emory University School of Medicine, Atlanta, GA 30322, USA

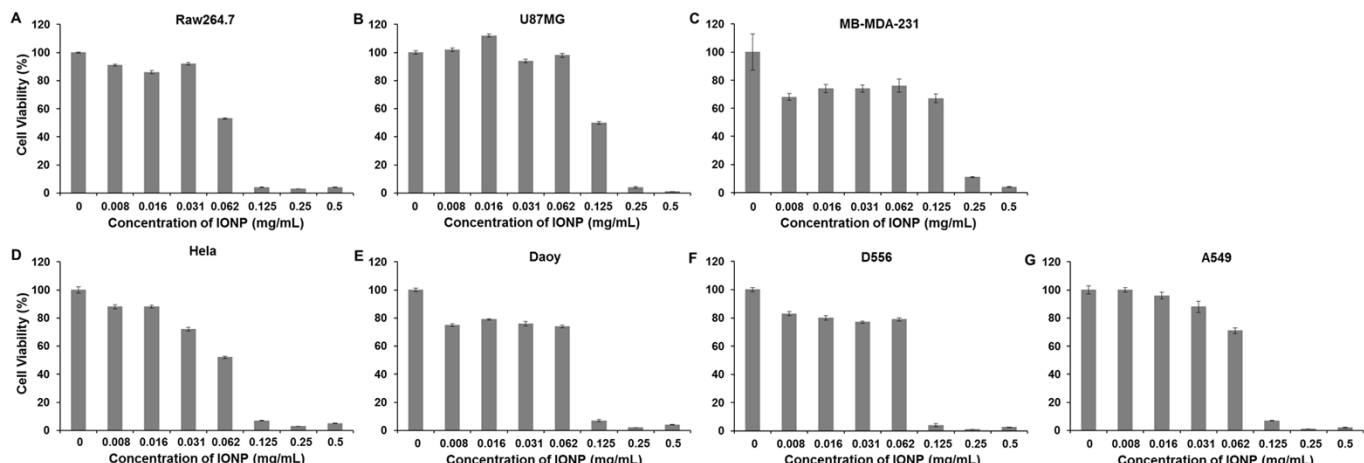

Fig

ure S1. MTT assay (3 day) of cytotoxicity of PEG-*b*-AGE coated IONP with (A) RAW264.7 macrophages, (B) Daoy medulloblastoma cells, (C) MB-MDA-231 breast cancer cells, (D) HeLa cells, (E) D556 medulloblastoma cells, (F) U87MG glioblastoma cells, and (G) A549 lung cancer cells.

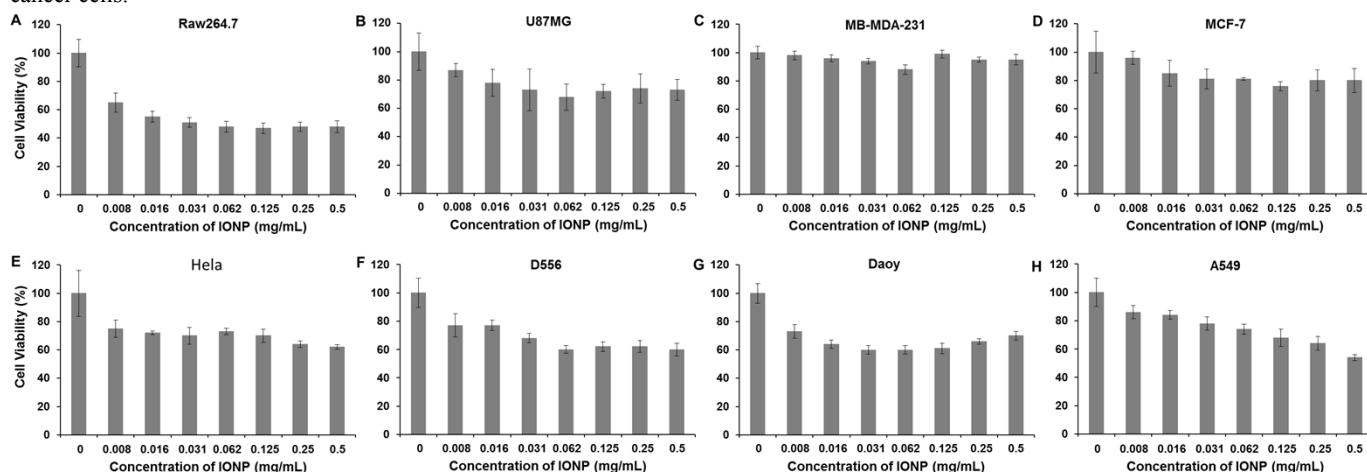

Figure S2. MTT assay (1 day) of cytotoxicity of RGD conjugated PEG-*b*-AGE coated IONP with (A) RAW264.7 macrophages, (B) Daoy medulloblastoma cells, (C) MB-MDA-231 breast cancer cells, (D) MCF-7 breast cancer cells, (E) HeLa cells, (F) D556 medulloblastoma cells, (G) U87MG glioblastoma cells, and (H) A549 lung cancer cells.

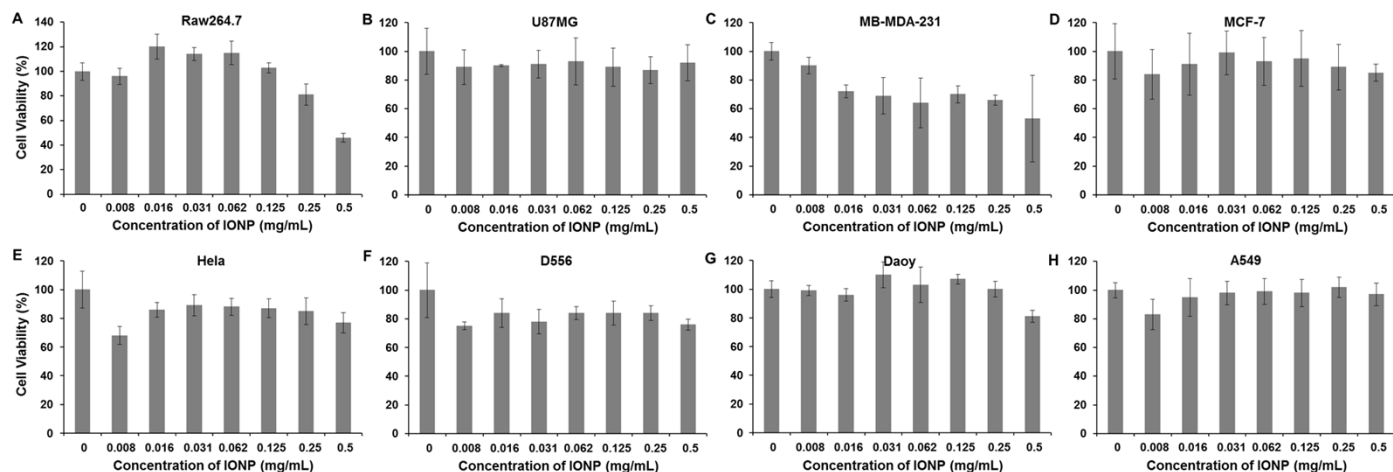

**Figure S3.** MTT assay (3 days) of cytotoxicity of RGD conjugated PEG-*b*-AGE coated IONP with (A) RAW264.7 macrophages, (B) Daoy medulloblastoma cells, (C) MB-MDA-231 breast cancer cells, (D) MCF-7 breast cancer cells, (E) HeLa cells, (F) D556 medulloblastoma cells, (G)U87MG glioblastoma cells, and (H) A549 lung cancer cells.

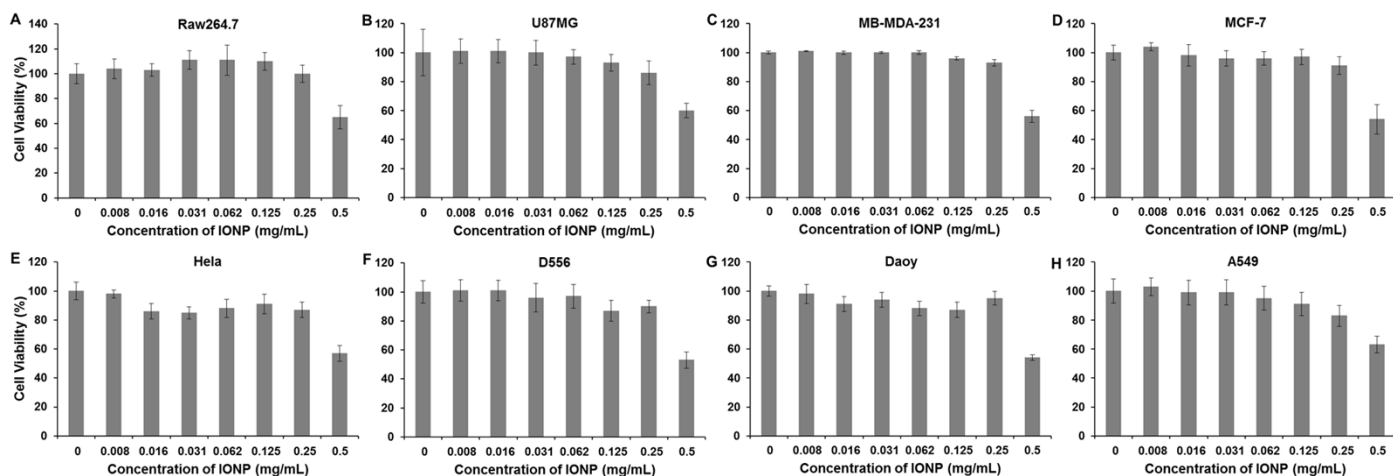

**Figure S4.** MTT assay (1 day) of cytotoxicity of Tf conjugated PEG-*b*-AGE coated IONP with (A) RAW264.7 macrophages, (B) Daoy medulloblastoma cells, (C) MB-MDA-231 breast cancer cells, (D) MCF-7 breast cancer cells, (E) HeLa cells, (F) D556 medulloblastoma cells, (G)U87MG glioblastoma cells, and (H) A549 lung cancer cells.

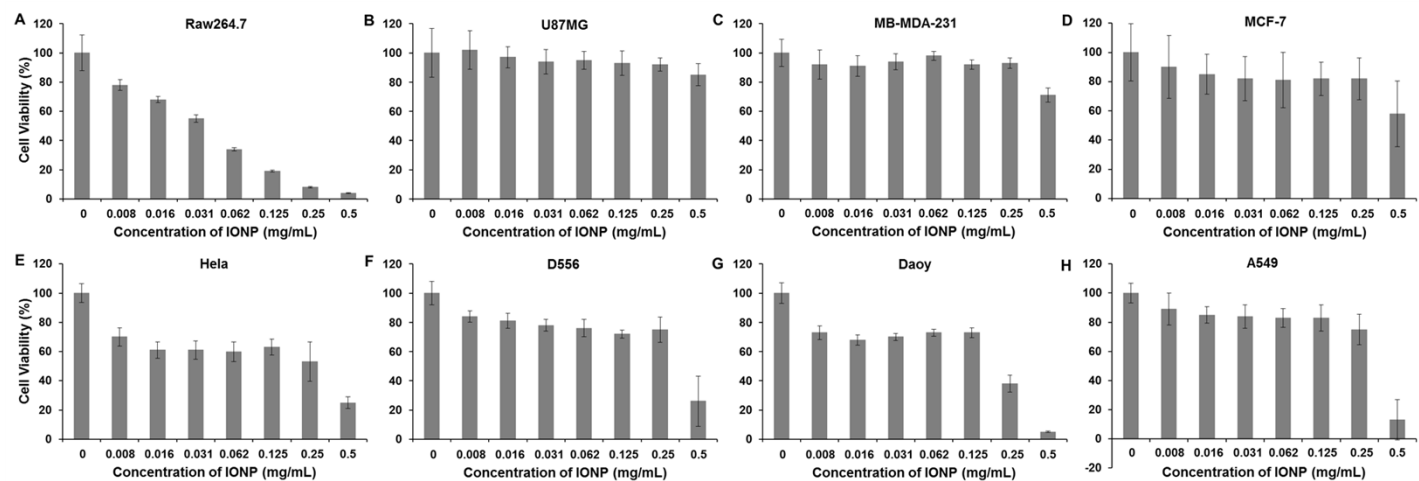

**Figure S5.** MTT assay (3 days) of cytotoxicity of Tf conjugated PEG-*b*-AGE coated IONP with (A) RAW264.7 macrophages, (B) Daoy medulloblastoma cells, (C) MB-MDA-231 breast cancer cells, (D) MCF-7 breast cancer cells, (E) Hela cells, (F) D556 medulloblastoma cells, (G) U87MG glioblastoma cells, and (H) A549 lung cancer cells.
